# Supplementary figures and images for: TALPID3 controls centrosome and cell polarity and the human ortholog KIAA0586 is mutated in Joubert syndrome (JBTS23)
Source: eLife journal article supplement (doi:10.7554/elife.08077), 2015-09-19

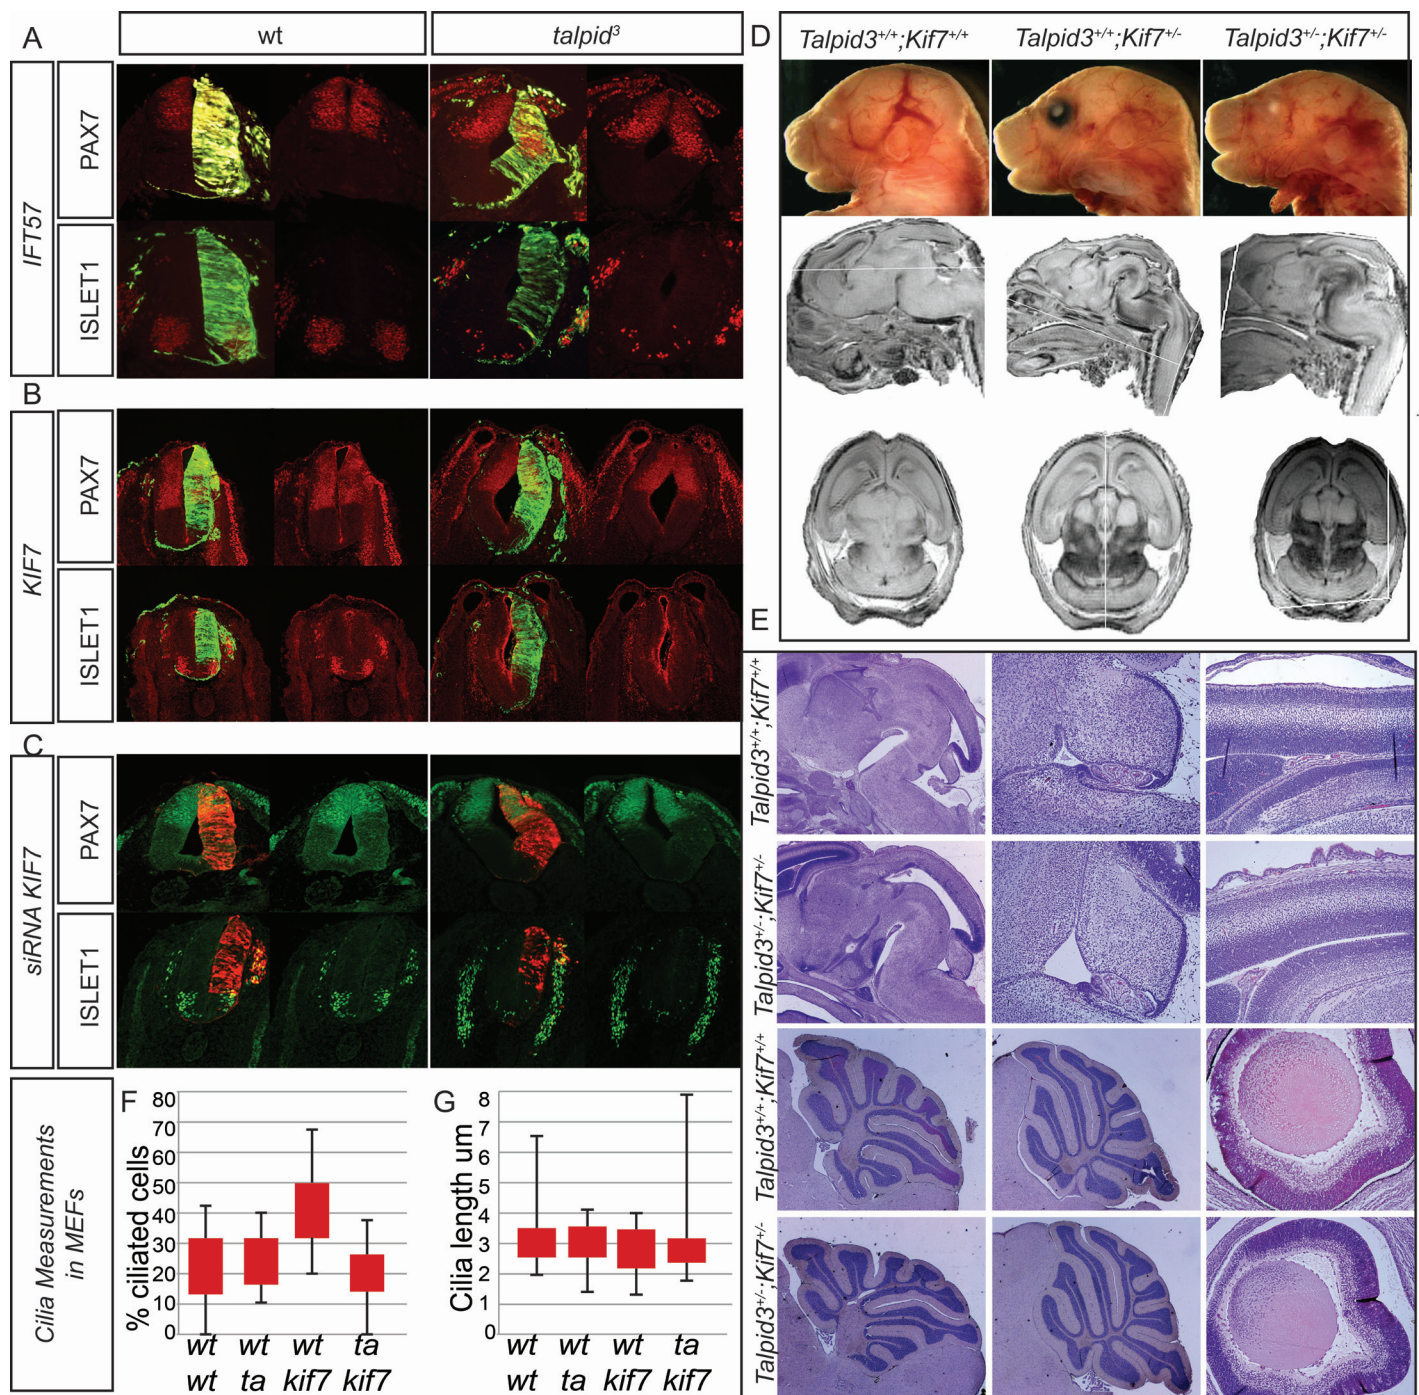

Supplementary Figure

Supplement: supp [file elife-08077-supp-v1.zip]
